# Supplementary material for: Histone malonylation is regulated by SIRT5 and KAT2A
Source: PubMed Central journal article supplement — iScience. 2023 Feb 13;26(3):106193. doi: 10.1016/j.isci.2023.106193 (PMC9985052; doi:10.1016/j.isci.2023.106193), 2023-02-13
Supplement: mmc1.pdf [file mmc1.pdf]

iScience, Volume 26

## **Supplemental information**

### **Histone malonylation is regulated by SIRT5 and KAT2A**

**Ran Zhang, Joanna Bons, Grace Scheidemantle, Xiaojing Liu, Olga Bielska, Chris Carrico, Jacob Rose, Indra Heckenbach, Morten Scheibye-Knudsen, Birgit Schilling, and Eric Verdin**

Supplemental figures

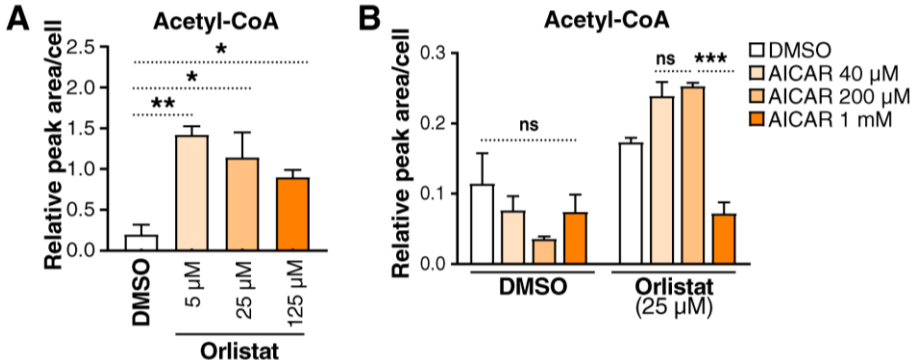

**Figure S1. Acetyl-CoA measurement, Related to Figure 1.** Acetyl-CoA levels in K562 cells treated with orlistat (A) or AICAR (B) at different doses as indicated for 24 h were measured with LC-MS. Quantified levels are normalized to cell count in each sample. N = 3 per treatment. Values are shown as mean  $\pm$  SEM. ns (not significant)  $\geq$  0.05, \*P < 0.05, \*\*P < 0.01, and \*\*\*P < 0.001 using unpaired student t test.

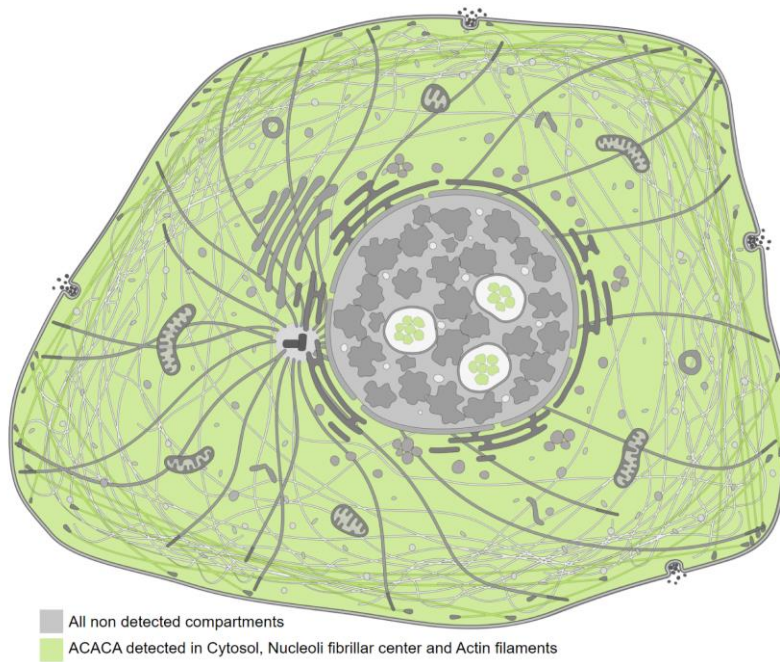

**Figure S2. ACC1 subcellular localization (the HPA database, proteinatlas.org), Related to Figure 5.**

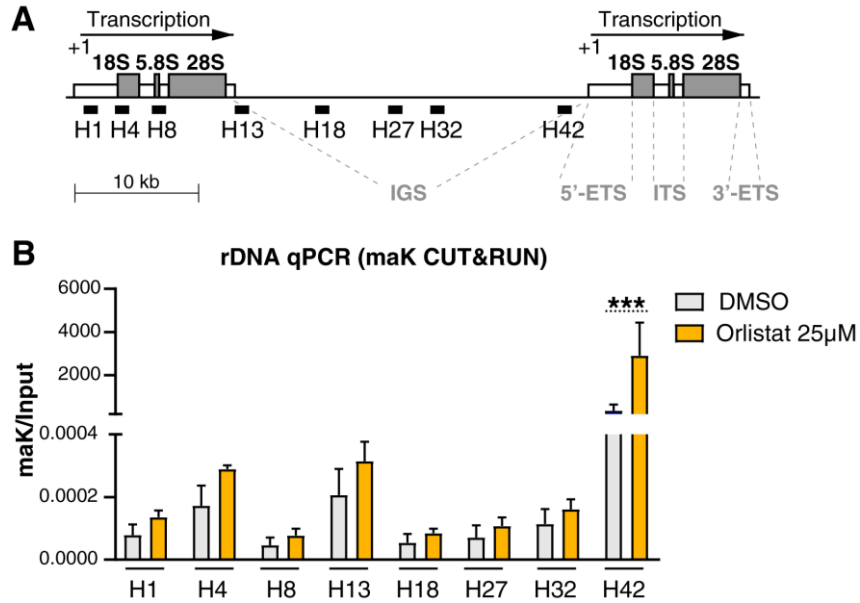

**Figure S3. Lysine malonylation (maK) CUT&RUN, Related to Figure 5.**

(A) Schematic representation of a human rDNA repeat with 8 primer pairs (solid bars) and their approximate positions relative to the transcription start site are indicated. IGS, intergenic spacer. 5' and 3'-ETS, 5' and 3'-external transcribed spacer. ITS, internal transcribed spacer.

(B) K562 cells treated with DMSO or 25 µM orlistat for 24 h were used for CUT&RUN of maK. The malonylation levels at 8 regions of rDNA were quantified using qPCR. 3 biological replicates per treatment. Values are shown as mean ± SEM. \*\*\*P < 0.001 using two-way ANOVA with Sidak multiple comparison.

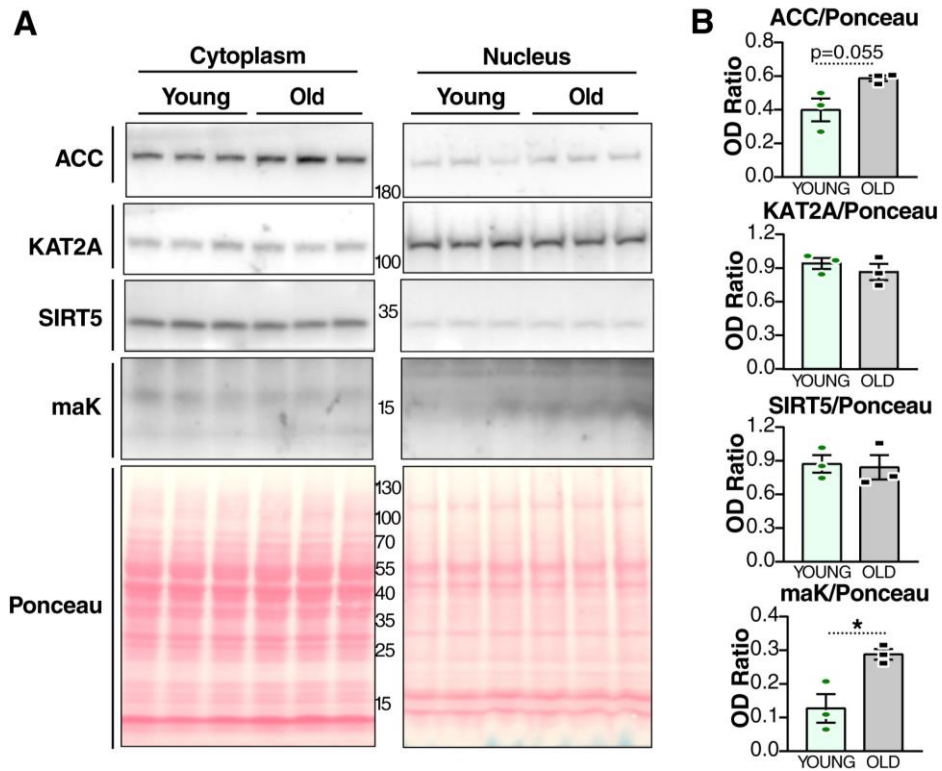

**Figure S4. Western blotting of cytoplasmic and nuclear proteins, Related to Figure 6.**

(A) Western blot of cytoplasmic and nuclear protein samples prepared from young (3-6 months old) and middle-aged (12-14 months old) female mouse whole brains.

(B) Quantification of the ODs of blots in the young and elder nuclear protein samples.  $n = 3$  per group. Error bar: mean  $\pm$  SEM, \* $p < 0.05$  with unpaired student t test.

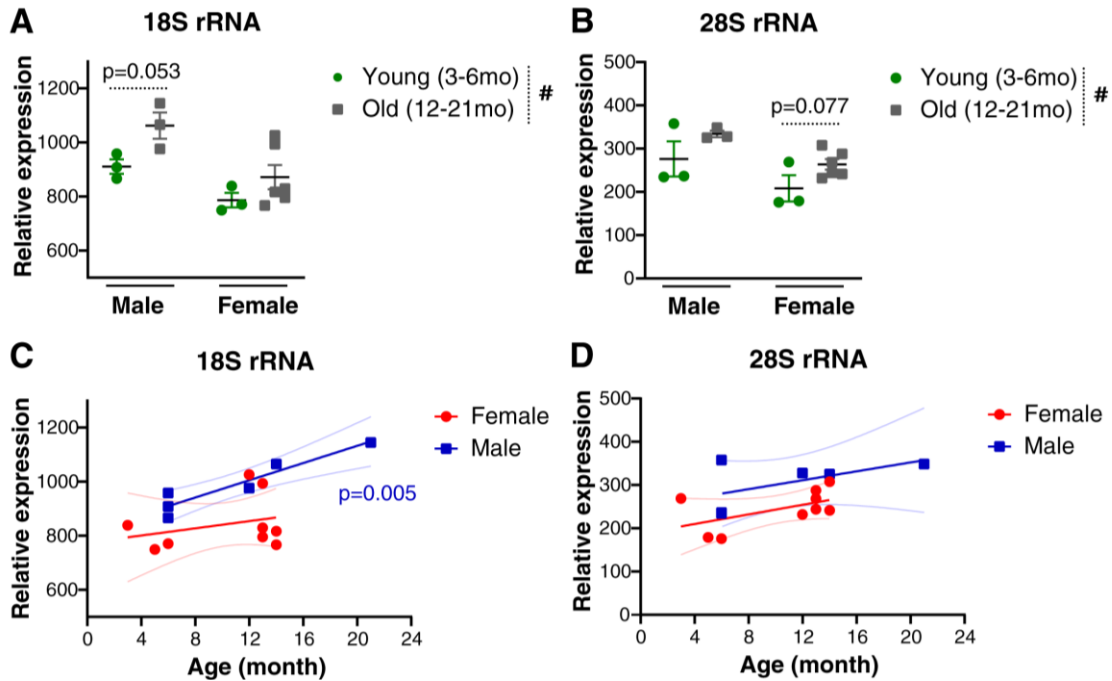

**Figure S5. Ribosomal RNAs increase with age in mouse brain, Related to Figure 6.**

(A and B) 18S and 28S rRNA in young (3-6 months old) and old (12-21 months old) male and female mouse brain tissues was quantified through real-time qPCR normalized to  $\beta$ -actin expression level. N= 3-6 per group. Error bar: mean  $\pm$  SEM. P values were indicated using unpaired student t test; # $p < 0.05$  using two-way ANOVA.

(C and D) Correlation between rRNA expression level and age of the mouse was analyzed using linear regression, with 95% confidence interval shown between light lines. Data were gender-stratified. P value was shown as indicated.
